# Supplementary material for: Comparison and evaluation of updates to WRF-Chem (v3.9) biogenic emissions using MEGAN
Source: Copernicus journal article supplement (doi:10.5194/gmd-2022-15), 2022-02-10
Supplement: Supplementary file 1 [file gmd-2022-15-supplement-version2.pdf]

## Supplemental materials for “Comparison and evaluation of updates to WRF-Chem (v3.9) biogenic emissions using MEGAN”

Table S1: Soil-related wilting point ( $\theta_w$ ) ( $\text{m}^3 \text{m}^{-3}$ ) used by MEGAN soil moisture emission activity factor. Adapted from Chen and Dudhia, 2001.

| Soil type        | Wilting point |
|------------------|---------------|
| Sand             | 0.01          |
| Loamy sand       | 0.028         |
| Sandy loam       | 0.047         |
| Silt loam        | 0.084         |
| Silt             | 0.084         |
| Loam             | 0.066         |
| Sandy clay loam  | 0.067         |
| Silty clay loam  | 0.12          |
| Clay loam        | 0.103         |
| Sandy clay       | 0.1           |
| Silty clay       | 0.126         |
| Clay             | 0.138         |
| Organic material | 0.06          |
| Water            | n.a.          |
| Bedrock          | 0.094         |
| Other (land-ice) | 0.028         |

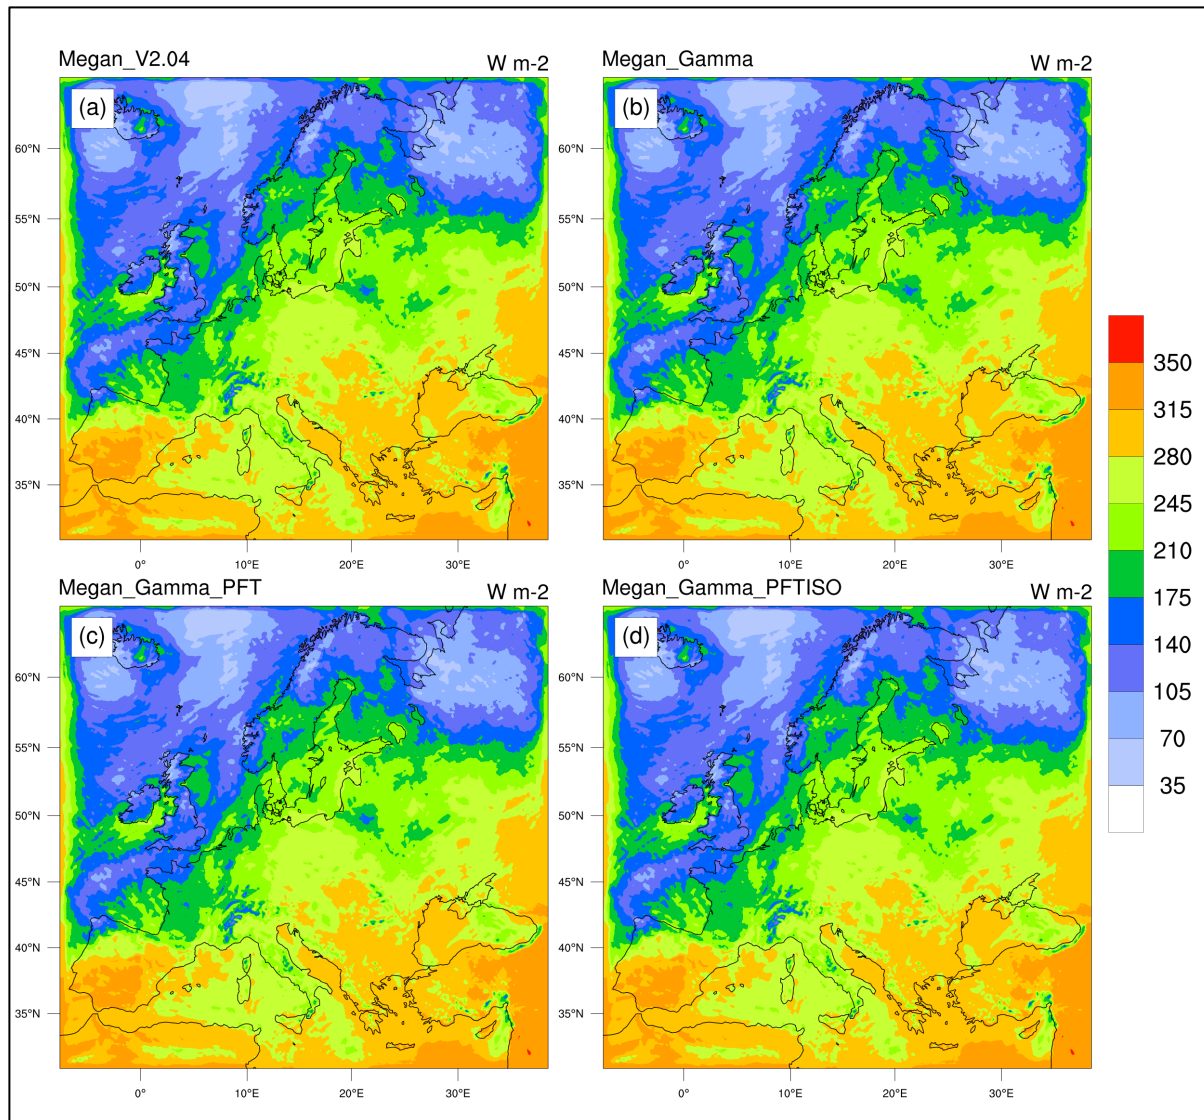

**Figure S1: Downward shortwave radiation flux ( $\text{W m}^{-2}$ ) averaged for the time period from August 10, 2015 at 0000 UTC to August 16, 2015 at 0000 UTC for the different WRF-Chem simulations, namely (a) control simulation (M2.04), (b) activity factors ( $\gamma_i$ ) updated (MG), (c) PFTs emission factors updated (MGPFT), and (d) the isoprene emission factor updated (M2.10).**

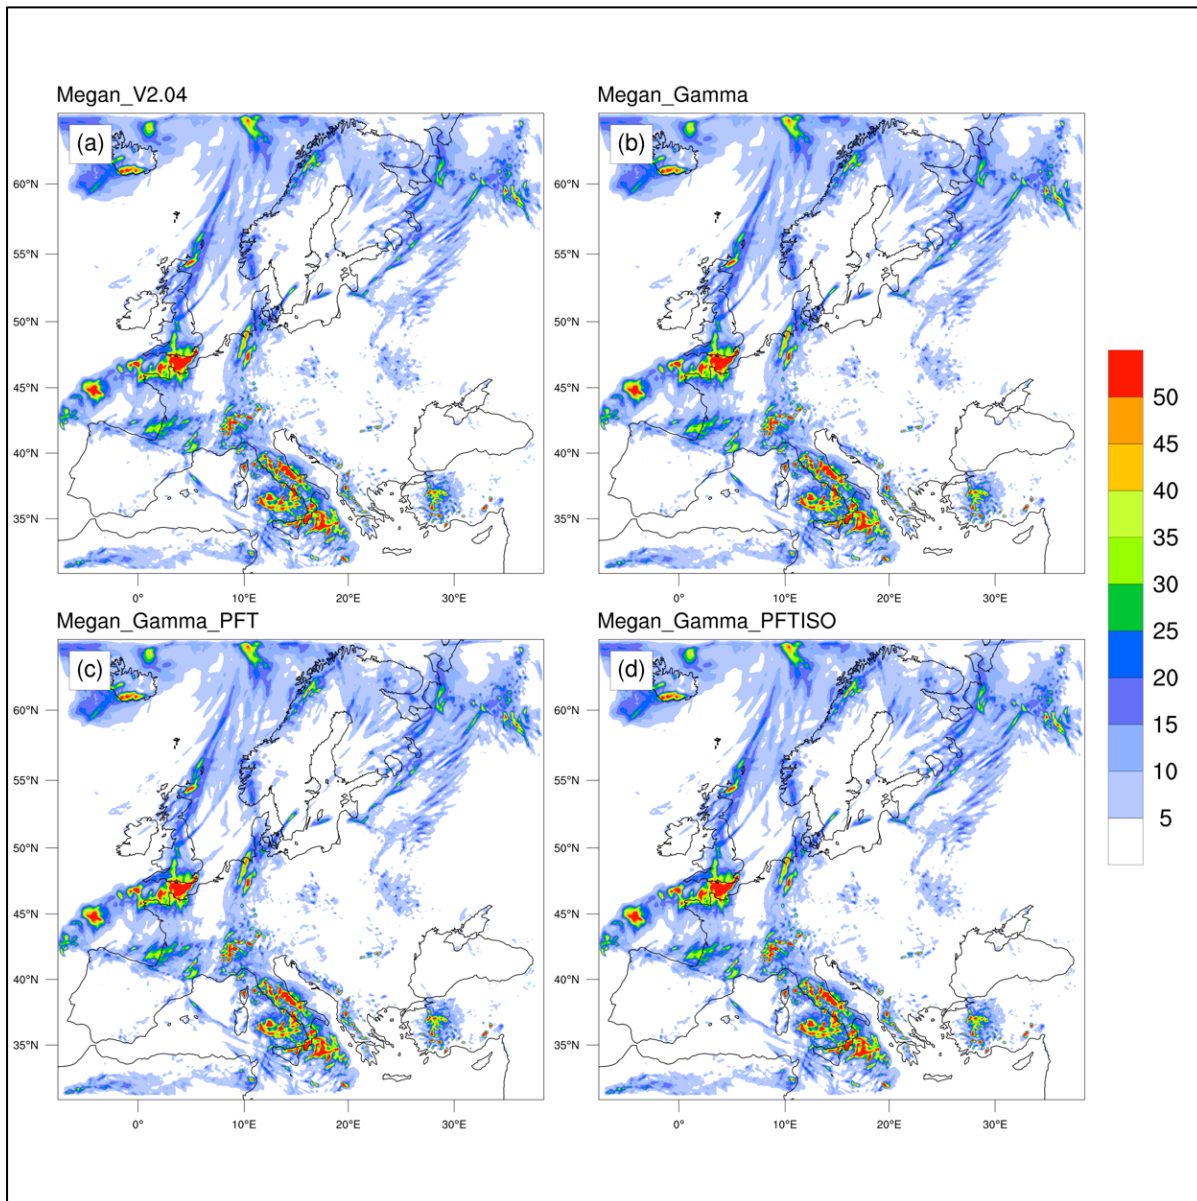

**Figure S2: Total precipitation (mm) averaged for the time period from August 10, 2015 at 0000 UTC to August 16, 2015 at 0000 UTC for the different WRF-Chem simulations, namely (a) control simulation (M2.04), (b) activity factors ( $\gamma_i$ ) updated (MG), (c) PFTs emission factors updated (MGPFT), and (d) the isoprene emission factor updated (M2.10).**

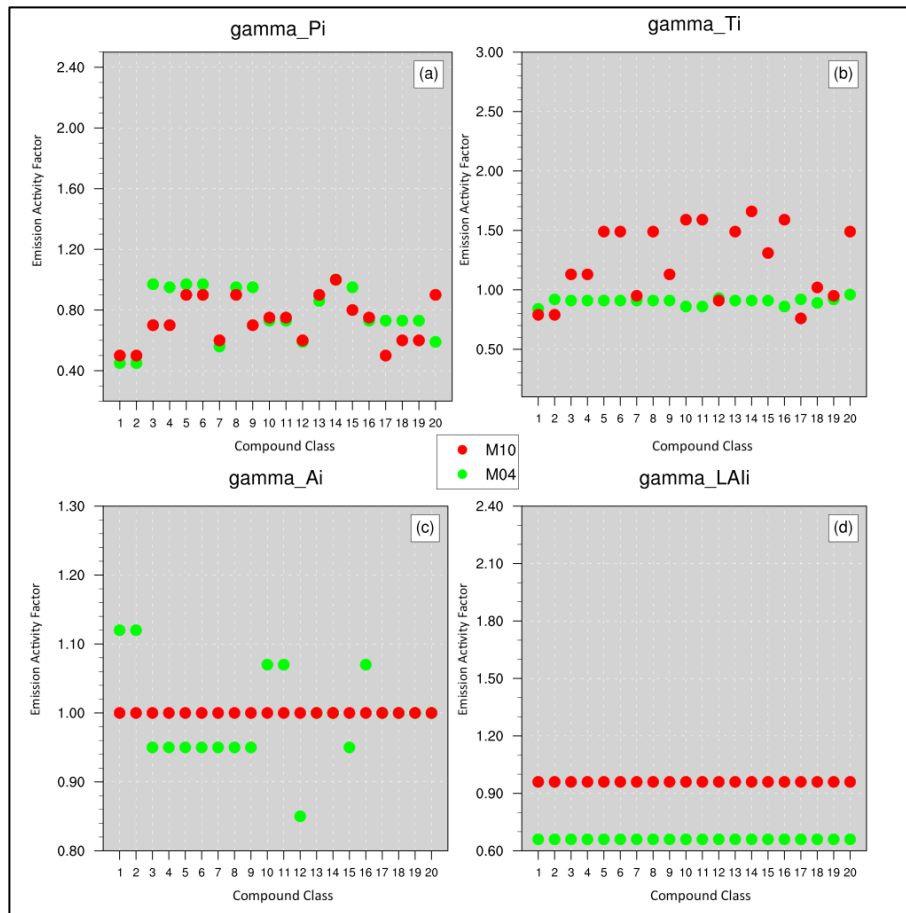

Figure S3: Emission activity factors (y-axis, dimensionless) from M2.04 (M04) and M2.10 (M10) for different compound classes (1. Isoprene, 2. Myrcene, 3. Sabinene, 4. Limonene, 5. 3-Carene, 6. *t*- $\beta$ -Ocimene, 7.  $\beta$ -Pinene, 8.  $\alpha$ -Pinene, 9. Other Monoterpenes, 10.  $\alpha$ -Farnesene, 11.  $\beta$ -Caryophyllene, 12. Other Sesquiterpenes, 13. 232-MBO, 14. Methanol, 15. Acetone, 16. Carbon Monoxide, 17. Nitric Oxide, 18. Bidirectional VOC, 19. Stress VOC and 20. other VOC). Each panel is for a different meteorological factor: (a) photosynthetic photon flux density ( $\gamma_P$ , GAMMA\_P), (b) temperature ( $\gamma_T$ , GAMMA\_T), (c) leaf age ( $\gamma_{Age}$ , GAMMA\_A), and (d) leaf area index ( $\gamma_{LAI}$ , GAMMA\_LAI). The factors refer to the city of Kiev (Ukraine) on August 13th 885 (12:00 UTC), 2015.

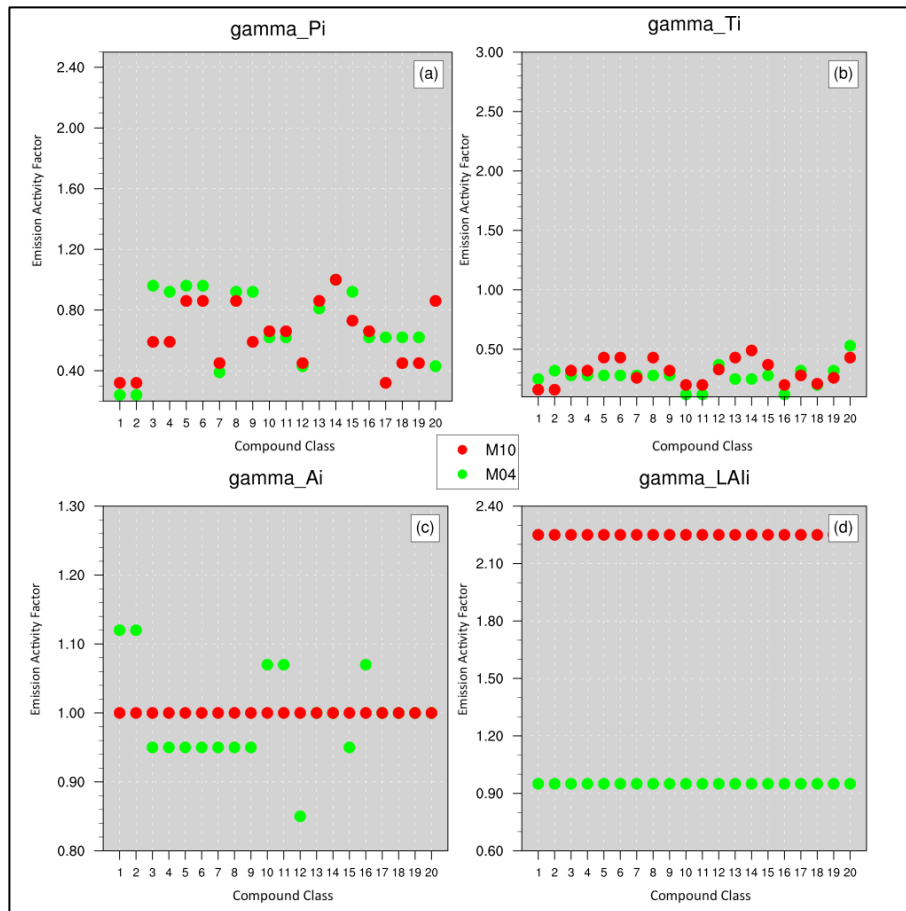

**Figure S4: Emission activity factors (y-axis, dimensionless) from M2.04 (M04) and M2.10 (M10) for different compound classes (1. Isoprene, 2. Myrcene, 3. Sabinene, 4. Limonene, 5. 3-Carene, 6. *t*- $\beta$ -Ocimene, 7.  $\beta$ -Pinene, 8.  $\alpha$ -Pinene, 9. Other Monoterpenes, 10.  $\alpha$ -Farnesene, 11.  $\beta$ -Caryophyllene, 12. Other Sesquiterpenes, 13. 232-MBO, 14. Methanol, 15. Acetone, 16. Carbon Monoxide, 17. Nitric Oxide, 18. Bidirectional VOC, 19. Stress VOC and 20. other VOC). Each panel is for a different meteorological factor: (a) photosynthetic photon flux density ( $\gamma_P$ , GAMMA\_P), (b) temperature ( $\gamma_T$ , GAMMA\_T), (c) leaf age ( $\gamma_{ages}$ , GAMMA\_A), and (d) leaf area index ( $\gamma_{LAI}$ , GAMMA\_LAI). The factors refer to the city of Porto (Portugal) on August 13th 885 (12:00 UTC), 2015.**

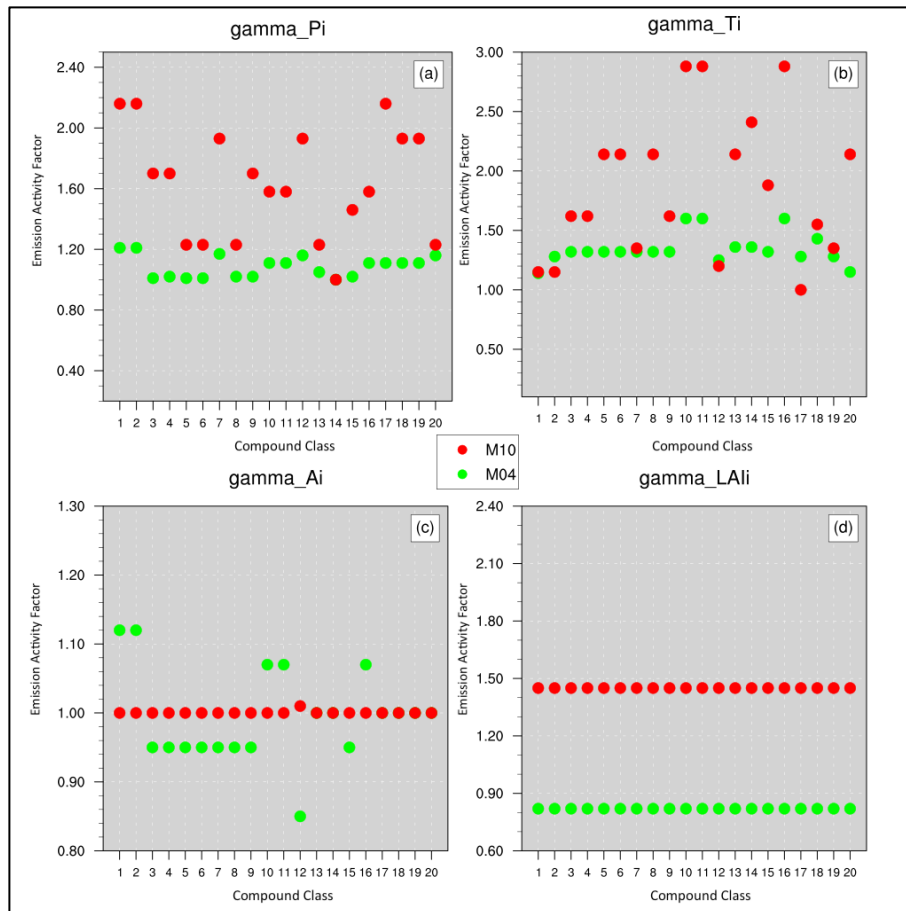

Figure S5: Emission activity factors (y-axis, dimensionless) from M2.04 (M04) and M2.10 (M10) for different compound classes (1. Isoprene, 2. Myrcene, 3. Sabinene, 4. Limonene, 5. 3-Carene, 6. *t*- $\beta$ -Ocimene, 7.  $\beta$ -Pinene, 8.  $\alpha$ -Pinene, 9. Other Monoterpenes, 10.  $\alpha$ -Farnesene, 11.  $\beta$ -Caryophyllene, 12. Other Sesquiterpenes, 13. 232-MBO, 14. Methanol, 15. Acetone, 16. Carbon Monoxide, 17. Nitric Oxide, 18. Bidirectional VOC, 19. Stress VOC and 20. other VOC). Each panel is for a different meteorological factor: (a) photosynthetic photon flux density ( $\gamma_P$ , GAMMA\_P), (b) temperature ( $\gamma_T$ , GAMMA\_T), (c) leaf age ( $\gamma_{age}$ , GAMMA\_A), and (d) leaf area index ( $\gamma_{LAI}$ , GAMMA\_LAI). The factors refer to the city of Zagreb (Crotia) on August 13th 885 (12:00 UTC), 2015.

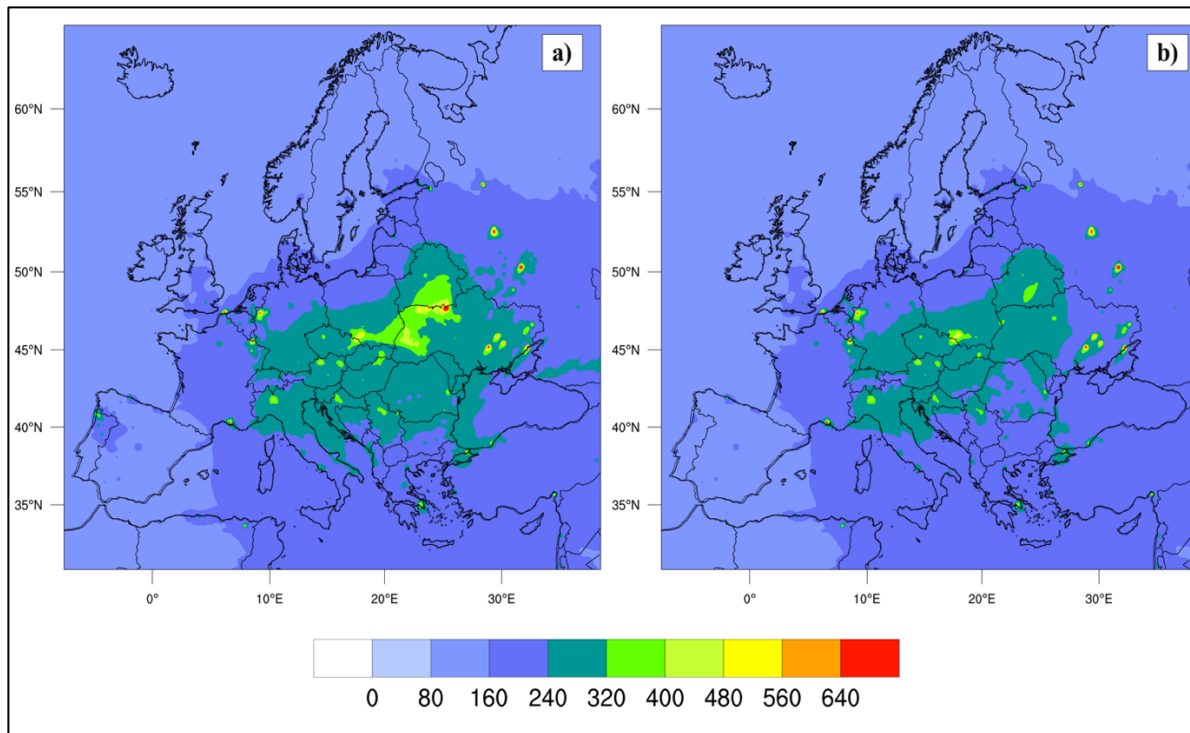

**Figure S6:** CO concentration ( $\mu\text{g m}^{-3}$ ) for the simulations (a) with all the MEGAN updates (M2.10 run), and (b) with all the MEGAN updates but without including the biomass burning emissions in the calculation (b - "M10\_noFINN"). The maps represent the weekly averages (from August 10<sup>th</sup>, 2015 at 0000 UTC to August 16<sup>th</sup>, 2015 at 0000 UTC), extrapolated from WRF-Chem model.



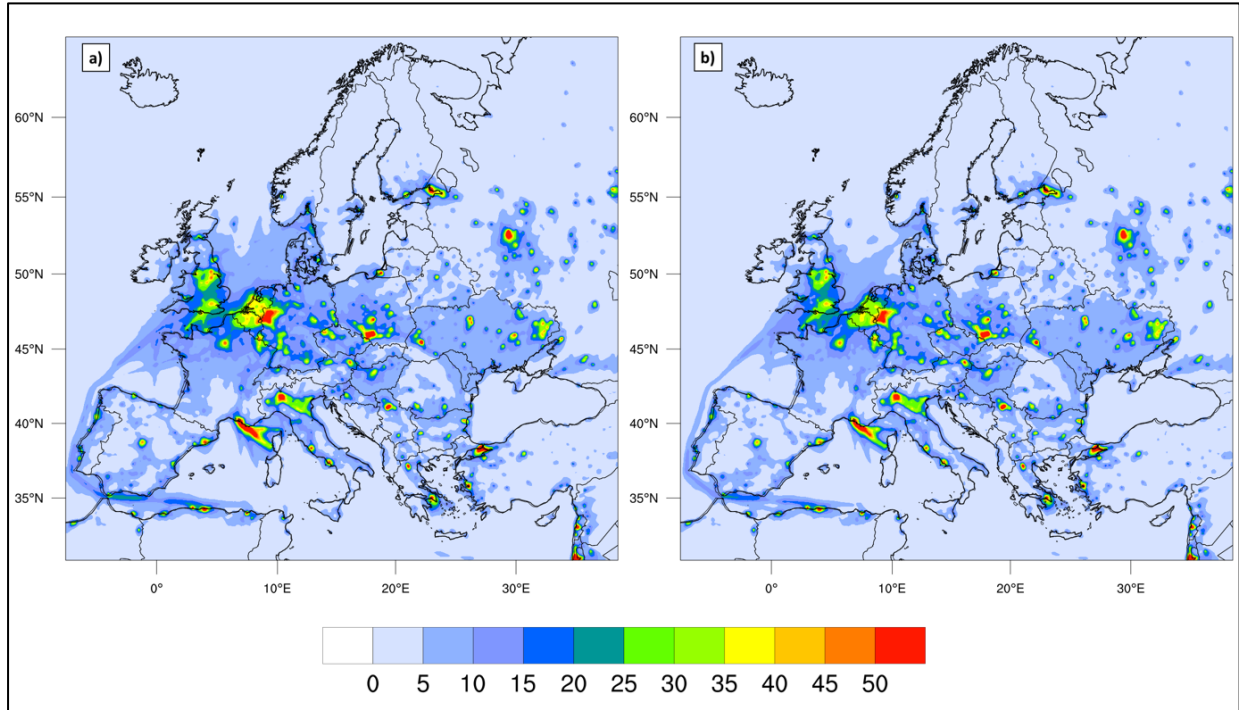

**Figure S7: NO<sub>2</sub> concentration ( $\mu\text{g m}^{-3}$ ) for the simulations (a) with all the MEGAN updates (M2.10 run), and (b) with all the MEGAN updates but without including the biomass burning emissions in the calculation (b - "M10\_noFINN"). The maps represent the weekly averages (from August 10th, 2015 at 0000 UTC to August 16th, 2015 at 0000 UTC), extrapolated from WRF-Chem model.**



**Table S2: Gas-phase reactions involving isoprene (ISOP) for the formation of methacrolein (MACR), and methyl vinyl ketone (MVK) in the MOZART-4 chemical mechanism. The table is adapted from Emmons et al., 2010.**

| Reactants                                            | Products                                                                                                                                                                                           |
|------------------------------------------------------|----------------------------------------------------------------------------------------------------------------------------------------------------------------------------------------------------|
| ISOP + OH                                            | → ISOPO <sub>2</sub>                                                                                                                                                                               |
| ISOP + O <sub>3</sub>                                | → 0.4·MACR + 0.2·MVK + 0.07·C <sub>3</sub> H <sub>6</sub> + 0.27·OH + 0.06·HO <sub>2</sub> + 0.6·CH <sub>2</sub> O + 0.3·CO + 0.1·O <sub>3</sub> + 0.2·MCO <sub>3</sub> + 0.2·CH <sub>3</sub> COOH |
| ISOPO <sub>2</sub> + NO                              | → 0.08·ONITR + 0.92·NO <sub>2</sub> + HO <sub>2</sub> + 0.55·CH <sub>2</sub> O + 0.23·MACR + 0.32·MVK + 0.37·HYDRALD                                                                               |
| ISOPO <sub>2</sub> + NO <sub>3</sub>                 | → HO <sub>2</sub> + NO <sub>2</sub> + 0.6·CH <sub>2</sub> O + 0.25·MACR + 0.35·MVK + 0.4·HYDRALD                                                                                                   |
| ISOPO <sub>2</sub> + HO <sub>2</sub>                 | → ISOPOOH                                                                                                                                                                                          |
| ISOPOOH + OH                                         | → 0.5·XO <sub>2</sub> + 0.5·ISOPO <sub>2</sub>                                                                                                                                                     |
| ISOPO <sub>2</sub> + CH <sub>3</sub> O <sub>2</sub>  | → 1.2·CH <sub>2</sub> O + 0.19·MACR + 0.26·MVK + 0.3·HYDRALD + 0.25·CH <sub>3</sub> OH + HO <sub>2</sub>                                                                                           |
| ISOPO <sub>2</sub> + CH <sub>3</sub> CO <sub>3</sub> | → 0.6·CH <sub>2</sub> O + 0.25·MACR + 0.35·MVK + 0.4·HYDRALD + CH <sub>3</sub> O <sub>2</sub> + HO <sub>2</sub> + CO <sub>2</sub>                                                                  |
| ISOP + NO <sub>3</sub>                               | → ISOPNO <sub>3</sub>                                                                                                                                                                              |
| ISOPNO <sub>3</sub> + NO                             | → 10.206·NO <sub>2</sub> + 0.072·CH <sub>2</sub> O + 0.167·MACR + 0.039·MVK + 0.794·ONITR + 0.794·HO <sub>2</sub>                                                                                  |
| ISOPNO <sub>3</sub> + NO <sub>3</sub>                | → 10.206·NO <sub>2</sub> + 0.072·CH <sub>2</sub> O + 0.167·MACR + 0.039·MVK + 0.794·ONITR + 0.794·HO <sub>2</sub>                                                                                  |
| ISOPNO <sub>3</sub> + HO <sub>2</sub>                | → 0.206·NO <sub>2</sub> + 0.008·CH <sub>2</sub> O + 0.167·MACR                                                                                                                                     |
| ISOPOOH + hν                                         | → 0.402·MVK + 0.288·MACR + 0.69·CH <sub>2</sub> O + HO <sub>2</sub>                                                                                                                                |
| TERPOOH + hν                                         | → OH + 0.1·CH <sub>3</sub> COCH <sub>3</sub> + HO <sub>2</sub> + MVK + MACR                                                                                                                        |

Table S3: Summary of the statistics between predicted and measured ozone, isoprene, methyl vinyl ketone (MVK), and methacrolein (MACR), namely the (a) normalized mean bias (bias - %), (b) normalized root mean square errors (nrmse – dimensionless), (c) the correlation coefficient (r - dimensionless), and the relative number of points analyzed (n<sub>xy</sub>). Values are shown according to the different NOMADSS flights (i.e., rf01, rf02, rf03, rf04, and rf05), and WRF-Chem model runs (M2.04, and M2.10).

|                      |              | rf01  |       | rf02  |       | rf03  |       | rf04  |       | rf05  |        |
|----------------------|--------------|-------|-------|-------|-------|-------|-------|-------|-------|-------|--------|
|                      |              | M2.04 | M2.10  |
| <b>O<sub>3</sub></b> | <b>nxy</b>   | 254   | 254   | 385   | 385   | 395   | 395   | 237   | 237   | 268   | 268    |
|                      | <b>nrmse</b> | 29.8  | 30.0  | 36.3  | 42.4  | 24.7  | 26.4  | 36.0  | 42.7  | 22.5  | 27.0   |
|                      | <b>r</b>     | 0.8   | 0.8   | -0.5  | -0.7  | 0.2   | 0.0   | -0.6  | -0.6  | 0.2   | -0.2   |
|                      | <b>bias</b>  | -13.4 | -11.5 | 24.3  | 30.4  | -3.6  | 2.0   | 22.6  | 31.4  | 7.8   | 11.9   |
| <b>Isoprene</b>      | <b>nxy</b>   | 88    | 88    | 162   | 162   | 168   | 168   | 121   | 121   | 59    | 59     |
|                      | <b>nrmse</b> | 161.3 | 128.4 | 59.8  | 500.3 | 97.3  | 427.9 | 78.4  | 697.9 | 274.8 | 1677.6 |
|                      | <b>r</b>     | 0.2   | 0.6   | 0.6   | 0.6   | 0.4   | 0.3   | 0.5   | 0.6   | 0.4   | 0.5    |
|                      | <b>bias</b>  | -85.1 | 4.3   | 27.1  | 437.7 | 26.2  | 298.5 | 41.6  | 621.8 | 203.6 | 1485.2 |
| <b>MVK</b>           | <b>nxy</b>   | 118   | 118   | 164   | 164   | 178   | 178   | 126   | 126   | 64    | 64     |
|                      | <b>nrmse</b> | 131.4 | 115.4 | 61.0  | 73.8  | 53.6  | 45.5  | 64.4  | 31.1  | 40.0  | 159.9  |
|                      | <b>r</b>     | 0.2   | 0.3   | 0.6   | 0.4   | 0.5   | 0.5   | 0.8   | 0.8   | 0.7   | 0.9    |
|                      | <b>bias</b>  | -86.7 | -10.3 | -39.6 | 35.6  | -41.1 | 17.7  | -56.8 | 12.3  | -22.3 | 147.1  |
| <b>MACR</b>          | <b>nxy</b>   | 118   | 118   | 164   | 164   | 174   | 174   | 124   | 124   | 60    | 60     |
|                      | <b>nrmse</b> | 129.2 | 428.4 | 113.3 | 565.9 | 136.4 | 440.1 | 99.8  | 697.1 | 223.1 | 1397.4 |
|                      | <b>r</b>     | 0.3   | 0.2   | 0.6   | 0.3   | 0.3   | 0.4   | 0.8   | 0.8   | 0.6   | 0.8    |
|                      | <b>bias</b>  | -64.7 | 204.6 | 87.2  | 493.8 | 95.5  | 382.8 | 79.8  | 645.8 | 178.0 | 1295.9 |

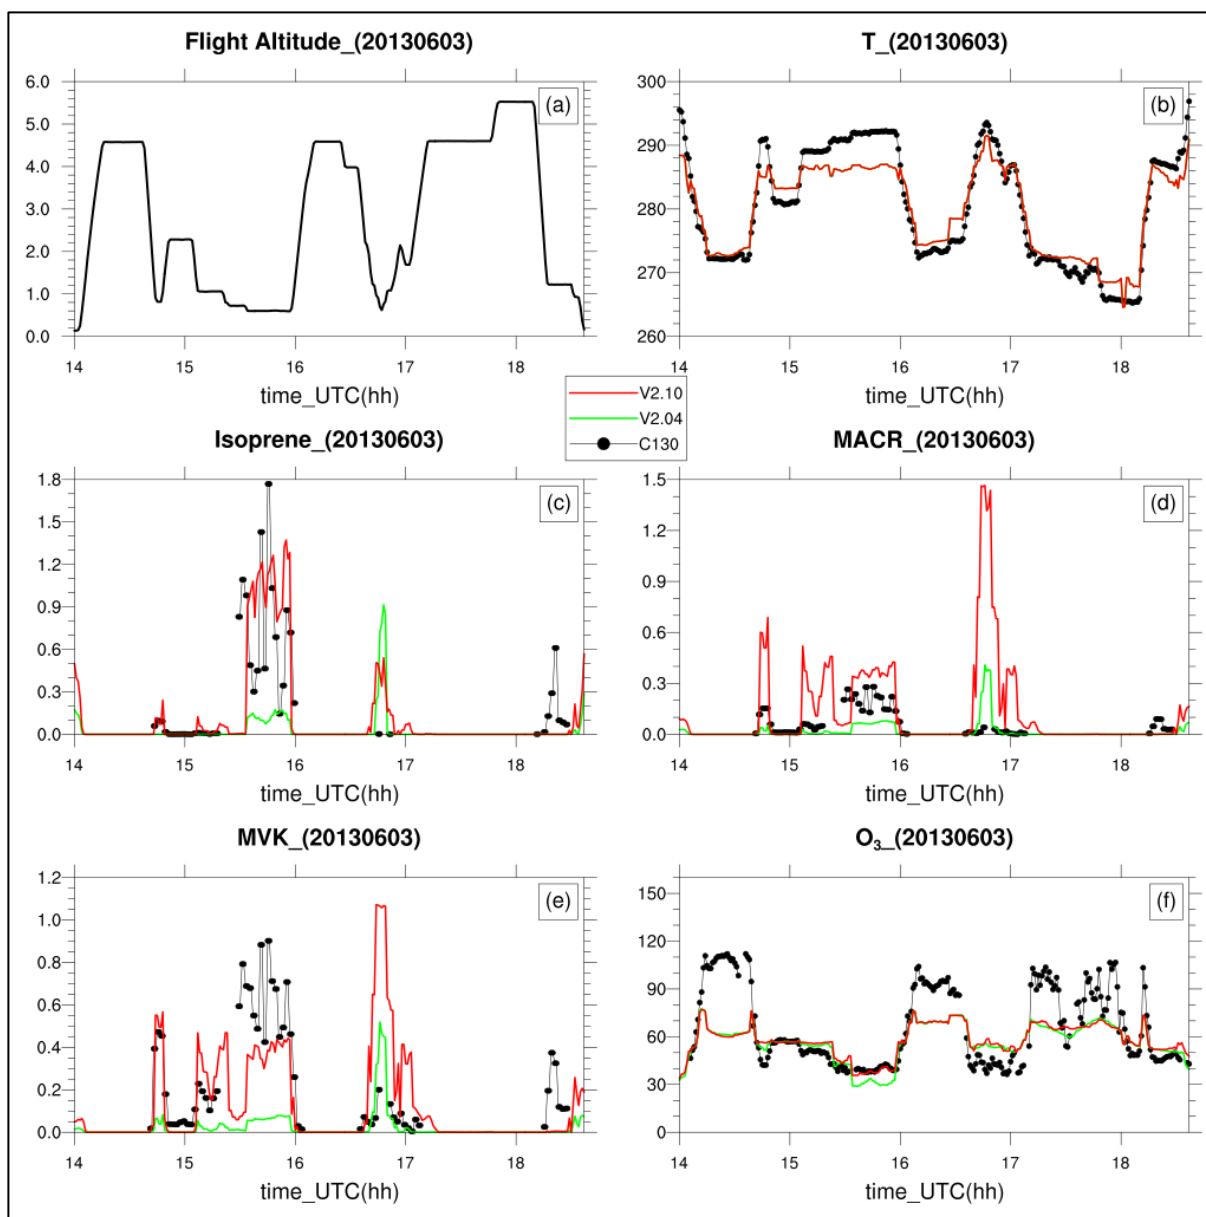

Figure S8: The flight altitude (a - km), the temperature (b - K), the concentration of isoprene (c - ppb), methacrolein (MACR) (d - ppb), methyl vinyl ketone (MVK) (e - ppb), and ozone (f - ppb), for the first NOMADSS flight (rf01). The black line shows the C-130 aircraft measurements, the green and red lines indicate the WRF-Chem model results using MEGAN version 2.04 (M2.04 run) and MEGAN updated to the version 2.10 (M2.10 run), respectively. In the panel b) the green line is not showed since it is overlapped by the red line, they have identical values.

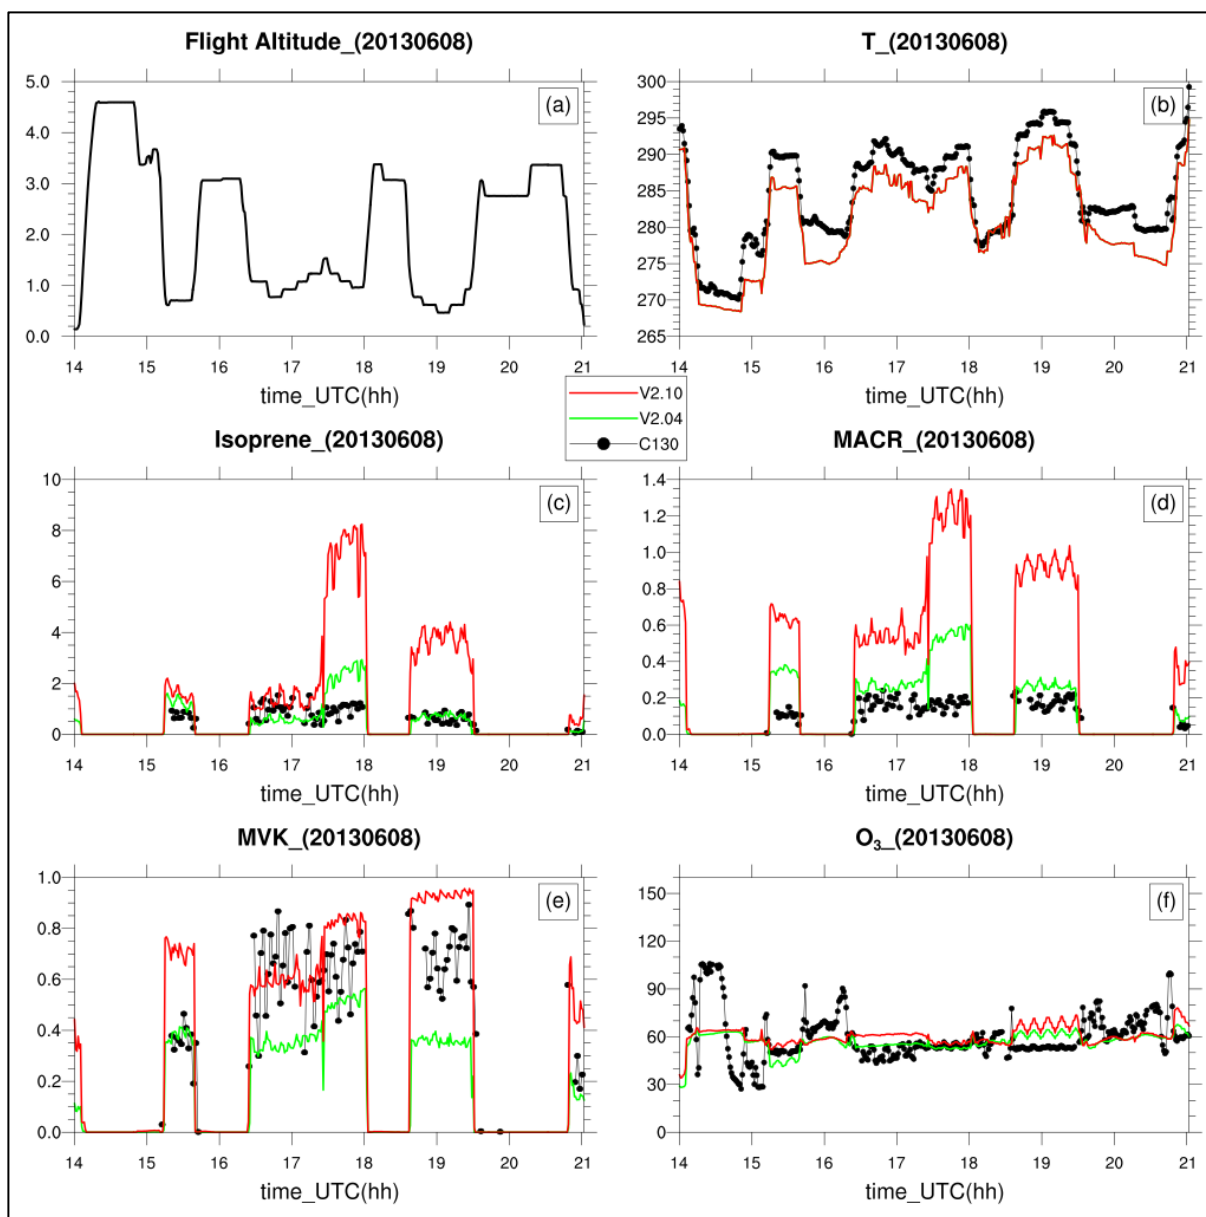

Figure S9: The flight altitude (a - km), the temperature (b - K), the concentration of isoprene (c - ppb), methacrolein (MACR) (d - ppb), methyl vinyl ketone (MVK) (e - ppb), and ozone (f - ppb), for the third NOMADSS flight (rf03). The black line shows the C-130 aircraft measurements, the green and red lines indicate the WRF-Chem model results using MEGAN version 2.04 (M04 run) and MEGAN updated to the version 2.10 (M10 run), respectively. In the panel b) the green line is not showed since it is overlapped by the red line, they have identical values.

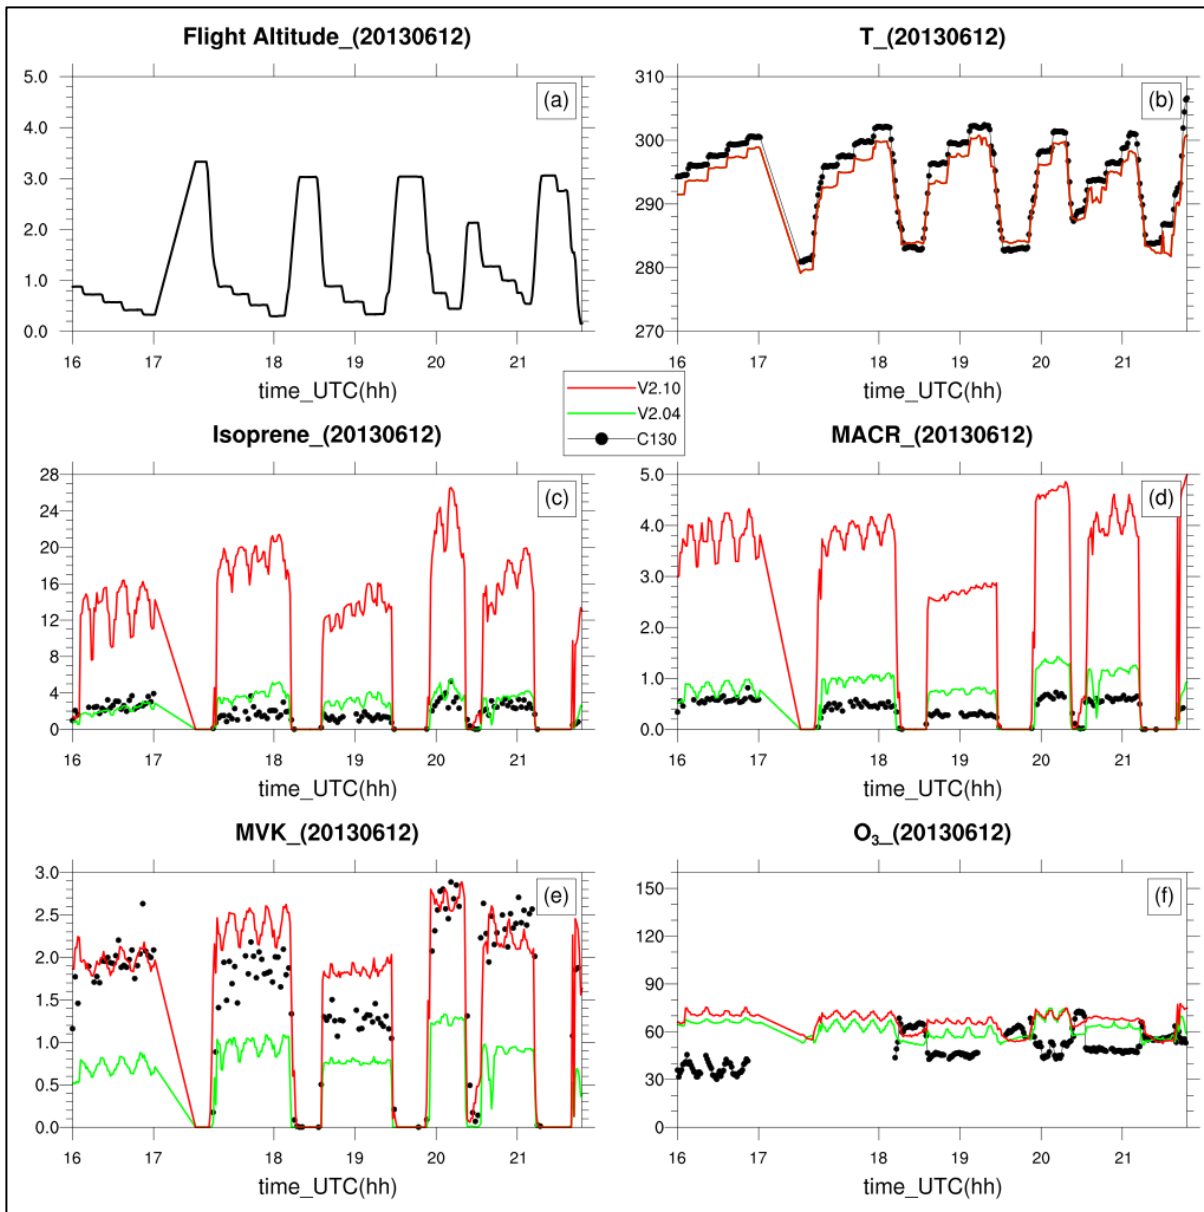

Figure S10: The flight altitude (a - km), the temperature (b - K), the concentration of isoprene (c - ppb), methacrolein (MACR) (d - ppb), methyl vinyl ketone (MVK) (e - ppb), and ozone (f - ppb), for the fourth NOMADSS flight (rf04). The black line shows the C-130 aircraft measurements, the green and red lines indicate the WRF-Chem model results using MEGAN version 2.04 (M04 run) and MEGAN updated to the version 2.10 (M10 run), respectively. In the panel b) the green line is not showed since it is overlapped by the red line, they have identical values.

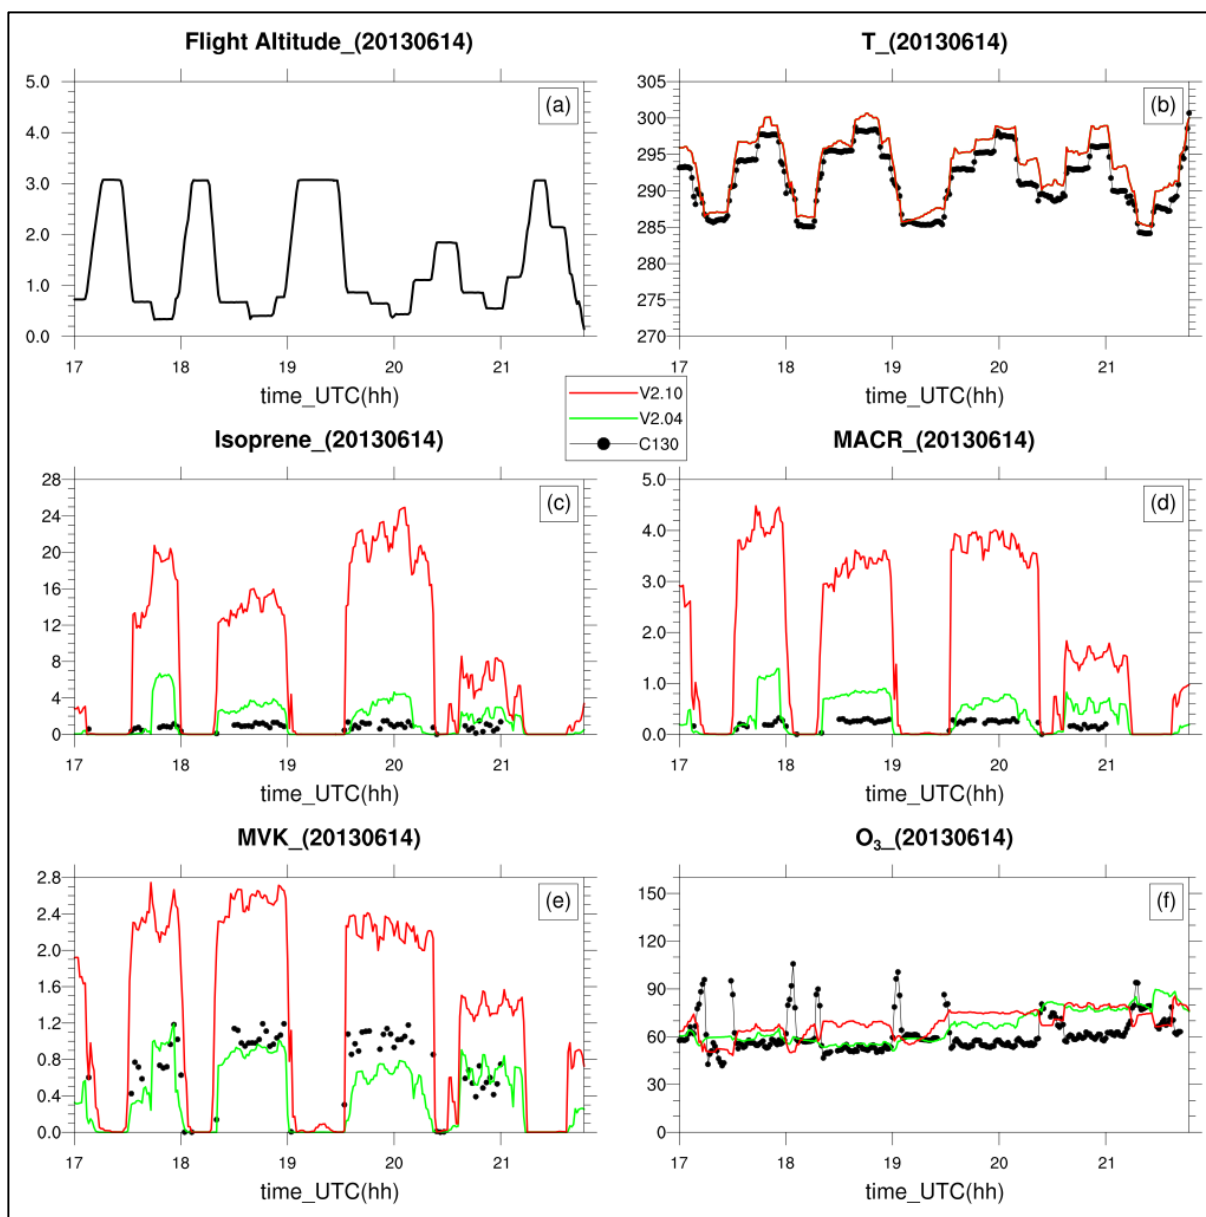

Figure S11: The flight altitude (a - km), the temperature (b - K), the concentration of isoprene (c - ppb), methacrolein (MACR) (d - ppb), methyl vinyl ketone (MVK) (e - ppb), and ozone (f - ppb), for the fifth NOMADSS flight (rf05). The black line shows the C-130 aircraft measurements, the green and red lines indicate the WRF-Chem model results using MEGAN version 2.04 (M04 run) and MEGAN updated to the version 2.10 (M10 run), respectively. In the panel b) the green line is not showed since it is overlapped by the red line, they have identical values.
